# Supplementary material
Source: publisher figshare collection journal article supplement (https://sage.figshare.com/ndownloader/files/12691661)
Supplement: Supplementary file 1 [file 12691661]

## Sheet: Sheet1
Sample No	Depth	LF	HF	%OM	%CaCo3	FD	CLAY %	SILT %	SAND %	Description
1	160	55.36	51.9	0.852222	1.07485	62.568	11.858	68.187	18.9361	Ap
2	205	63.68	58.92	1.1424	1.26674	74.772	15.0873	73.131	10.8893	Bw
3	210	59.04	57.65	0.548777	0.970147	23.558	5.46472	75.5026	18.1106	1C
4	225	68.89	63.09	1.44305	1.21891	84.197	18.6031	77.8293	3.27285	1C2
5	245	71.3	65.12	1.40017	1.24561	86.677	21.6193	76.4729	1.90784	2Abp1
6	255	58.23	54.33	1.06197	1.15292	66.973	13.7756	81.0778	4.23548	2Abp2
7	325	46.14	44.21	0.617747	0.963638	41.854	5.8063	78.6745	14.6604	2C1
8	330	61.76	56.11	1.39488	1.22991	91.505	20.8638	74.7505	4.38565	2C2
9	345	65.18	59.35	1.352	1.17164	89.464	17.1785	78.8906	3.47441	3Ab1
10	410	38.58	37.41	0.603372	0.926458	30.215	5.45571	83.5258	10.2597	3C1
11	430	72.71	65.31	1.19571	1.1073	101.74	20.0913	77.4153	2.37705	4Ab
12	445	42.6	39.95	0.75272	0.946953	62.093	7.71197	86.6831	4.56521	4C1
13	460	66.43	60.48	1.34352	1.30401	89.524	16.9483	79.5546	2.95742	4C2
14	465	49.52	45.61	1.04329	1.09787	78.882	13.6853	82.1754	3.38011	5Ab1
15	485	55.54	50.96	0.993818	1.15135	82.392	16.4225	79.2749	3.70051	5Ab2
16	525	38.96	37.5	0.588071	0.873046	37.616	5.03628	76.4173	17.8775	5C1
17	540	50.14	46.33	0.848332	1.02417	75.971	11.184	83.4381	4.31803	6Ab top
18	545	47.54	43.95	0.883392	1.09376	75.534	12.5271	83.982	2.35131	6Ab bottom
19	547	51.13	47.21	1.12589	1.08952	76.648	17.8061	80.0123	1.64521	6C
20	557	69.98	64.03	1.17689	1.21759	85.146	19.7069	77.9047	1.96244	7Ab top
21	560	73.45	66.12	1.25512	1.27534	99.862	25.3903	73.8148	0.794908	7Ab bottom
22	570	46.02	42.38	1.00596	1.02235	78.958	16.2505	80.8524	2.45416	7Ab2 top
23	590	83.24	74.73	1.83486	1.62945	102.258	31.3965	67.4147	1.18881	7C
24	615	61.71	56.1	1.36875	1.12612	91.027	19.2398	78.3358	1.98984	8Ab
25	620	48.2	44.06	1.10354	1.04933	85.851	14.7044	80.3694	4.05904	8Ab - bottom
26	625	43.99	40.96	0.96181	1.02338	68.87	11.5028	81.9677	5.34941	8Ab2 top
27	630	68.41	62.21	1.92817	1.65163	90.676	40.7671	58.4385	0.794391	8C
28	640	55.53	52.82	0.778391	1.02083	48.765	12.2419	74.255	12.4542	9Ab top
29	645	54.29	50.86	0.97561	1.05875	63.204	13.7751	75.0764	10.4071	9Ab bot
30	650	52.51	48.33	1.14052	1.15641	79.662	20.1275	72.8958	6.94062	9C1
31	670	34.6	33.08	0.738403	1.05804	43.948	7.57723	80.3121	10.9378	9C2 top
32	700	42.29	39.31	1.11631	1.22907	70.363	15.2264	79.9361	4.01758	9C2 mid
33	720	39.39	37.47	0.710939	0.871248	48.745	8.21262	81.486	9.27393	9C2 bot
34	740	19.92	19.27	1.40302	1.25995	32.582	20.2452	77.8639	1.89093	10Ab top
35	750	25.72	24.71	1.18017	1.22098	39.126	14.1487	81.6354	3.45099	10Ab bot
36	770	18.97	18.3	1.33025	1.31834	35.365	14.1996	82.1375	2.98067	10 C1
37	775	21.75	21.05	1.47857	1.2713	31.825	14.871	83.2062	1.27974	10C2
38	785	35.76	34.41	NA	NA	37.833	8.74387	85.0403	4.94592	10C3
